# Supplementary material for: Usability Testing and Piloting of the Mums Step It Up Program - A Team-Based Social Networking Physical Activity Intervention for Women with Young Children
Source: PLoS One. 2014 Oct 1;9(10):e108842. doi: 10.1371/journal.pone.0108842 (PMC4182756; doi:10.1371/journal.pone.0108842)
Supplement: File S2 — Data. (XLSX) [file pone.0108842.s002.xlsx]

## Sheet: Sheet1
Custom Data	Please enter the ID number that was provided in the email. (Please refer back to the email which provided you with the link to this survey)					Please indicate your educational achievements (tick all boxes that apply to you)?				Are you working?	Have you smoked in the last 7 days?	Are you pregnant?	Marital status?	How many people do you live with?		In the last week, how many times have you walked continuously, for at least 10 minutes, for recreation, exercise, or to get to or from places?	What do you estimate was the total time that you spent walking in this way in the last week? In hours and/or minutes				In the last week, how many times did you do any vigorous gardening or heavy work around the yard, which made you breathe harder or puff and pant?	What do you estimate was the total time that you spent doing vigorous gardening or heavy work around the yard in the last week? In hours and/or minutes				In the last week, how many times did you do any vigorous physical activity which made you breathe harder or puff and pant? (e.g. jogging, cycling, aerobics, competitive tennis)	What do you estimate was the total time that you spent doing this vigorous physical activity in the last week? In hours/and or minutes.					In the last week, how many times did you do any other more moderate physical activities that you have not already mentioned? (e.g. gentle swimming, social tennis, golf)	What do you estimate was the total time that you spent doing these activities in the last week? In hours and/or minutes						For me, achieving 10,000 steps per day over the next month would be:	For me, achieving 10,000 steps per day over the next month would be:	For me, achieving 10,000 steps per day over the next month would be:	For me, achieving 10,000 steps per day over the next month would be:	For me, achieving 10,000 steps per day over the next month would be:	For me, achieving 10,000 steps per day over the next month would be:	I think that if I were to achieve 10,000 steps per day over the next month, most people who are important to me would be:	I think that if I were to achieve 10,000 steps per day over the next month, most people who are important to me would be:	I think that if I were to achieve 10,000 steps per day over the next month, most people who are important to me would be:	Most people who are important to me, will themselves exercise regularly over the next month	Over the next month, most people who are important to me will be physically:
_x0000_	Open-Ended Response	participant age	Child 1 Age	Child 2 Age	Child 3 Age	Some high school	Completed year 12	Diploma/TAFE certificate	University degree or higher	Response	Response	Response	Response	Number of children	Number of adults (not including yourself)	Times	Hours and/or	hrs to mins	Minutes	Tot mins walk	Times	Hours and/or	hrs to mins	Minutes	Tot mins gard/yard	Times	Hours and/or	hrs to mins	Minutes	Tot mins vig	Vig x2	Times	Hours and/or	hrs to mins	Minutes	Tot mins mod	Total Activity Time	LOG TotAct	Response	Response	Response	Response	Response	Response	Response	Response	Response	Response	Response
1	1	34	1				Completed year 12		University degree or higher	No (or on maternity leave)	No	No	Married	1	1	4	3	180	0	180	0	0	0	0	0	0	0	0	0	0	0	0	0	0	0	0	180	2.25768	7 beneficial	7 useful	7 important	7 enjoyable	7 fun	7 pleasurable	7 approving	7 supportive	7 encouraging	2	4
2	2	36	4	0					University degree or higher	Yes part time	No	No	Married	2	1	12	5	300	0	300	0	0	0	0	0	0	0	0	0	0	0	1	1	60	0	60	360	2.55751	7 beneficial	7 useful	7 important	7 enjoyable	7 fun	7 pleasurable	7 approving	7 supportive	7 encouraging	4	4
3	3	36	4	0			Completed year 12		University degree or higher	No (or on maternity leave)	No	No	Married	2	1	2	2	120	0	120	0	0	0	0	0	0	0	0	0	0	0	0	0	0	0	0	120	2.08279	7 beneficial	7 useful	5	7 enjoyable	6	6	7 approving	7 supportive	7 encouraging	5	5
4	4	42	13	11	3				University degree or higher	Yes part time	No	No	Defacto relationship	3	2	0	0	0	0	0	3	12	720	0	720	0	0	0	0	0	0	0	0	0	0	0	0	0	7 beneficial	7 useful	7 important	6	7 fun	7 pleasurable	6	6	7 encouraging	5	6
5	5	35	4	2					University degree or higher	Yes part time	No	No	Married	2	1	2	0	0	30	30	3	2	120	0	120	1	0	0	30	30	60	0	0	0	0	0	90	1.95904	7 beneficial	6	6	6	6	5	7 approving	7 supportive	7 encouraging	6	6
12	12	36	3	1					University degree or higher	Yes part time	No	No	Married	2	1	7	3	180	0	180	0	0	0	0	0	0	0	0	0	0	0	0	0	0	0	0	180	2.25768	7 beneficial	7 useful	7 important	7 enjoyable	6	6	7 approving	7 supportive	7 encouraging	3	3
13	13	35	2						University degree or higher	Yes full time	No	No	Married	1	1	0	0	0	0	0	0	0	0	0	0	0	0	0	0	0	0	0	0	0	0	0	0	0	7 beneficial	4	5	4	5	5	7 approving	7 supportive	7 encouraging	3	3
15	15	34	4	2					University degree or higher	Yes part time	Yes	No	Married	2	1	8	3	180	0	180	0	0	0	0	0	7	8	480	30	510	1020	1	0	0	45	45	1245	3.09552	7 beneficial	7 useful	7 important	7 enjoyable	6	6	7 approving	7 supportive	7 encouraging	7 agree	7 active
16	16	33	3				Completed year 12	Diploma/TAFE certificate	University degree or higher	Yes part time	No	No	Defacto relationship	1	1	3	2	120	0	120	0	0	0	0	0	3	3	180	0	180	360	0	0	0	0	0	480	2.68215	7 beneficial	7 useful	7 important	7 enjoyable	7 fun	7 pleasurable	7 approving	7 supportive	7 encouraging	3	3
21	21	35	1						University degree or higher	No (or on maternity leave)	No	No	Defacto relationship	1	1	5	0	0	300	300	0	0	0	0	0	5	0	0	300	300	600	2	0	0	60	60	960	2.98272	7 beneficial	7 useful	7 important	7 enjoyable	7 fun	7 pleasurable	7 approving	7 supportive	7 encouraging	3	4
22	22	40	5	2			Completed year 12			Yes part time	No	No	Married	2	1	1	0	0	45	45	0	0	0	0	0	0	0	0	0	0	0	0	0	0	0	0	45	1.66276	7 beneficial	7 useful	5	6	6	6	7 approving	6	7 encouraging	6	6
23	23	35	5	2		Some high school	Completed year 12	Diploma/TAFE certificate	University degree or higher	Yes part time	No	No	Married	2	1	1	2	120	0	120	0	0	0	0	0	0	0	0	0	0	0	0	0	0	0	0	120	2.08279	7 beneficial	7 useful	7 important	4	4	4	6	6	6	5	4
25	25	34	3	2					University degree or higher	Yes part time	No	No	Married	2	1	2	0	0	60	60	1	0	0	10	10	0	0	0	0	0	0	0	0	0	0	0	60	1.78533	7 beneficial	7 useful	6	7 enjoyable	7 fun	7 pleasurable	6	6	7 encouraging	3	4
26	26	37	3				Completed year 12	Diploma/TAFE certificate	University degree or higher	Yes part time	No	No	Single	1	0	3	2	120	0	120	0	0	0	0	0	2	2	120	0	120	240	0	0	0	0	0	360	2.55751	7 beneficial	6	6	6	5	6	6	7 supportive	7 encouraging	6	5
32	32	35	6	4	2				University degree or higher	Yes part time	No	No	Married	3	1	1	1	60	5	65	0	0	0	0	0	1	0	0	35	35	70	1	0	0	15	15	150	2.17898	7 beneficial	5	6	5	4	4	7 approving	7 supportive	7 encouraging	5	6
33	33	35	4	2					University degree or higher	Yes part time	No	No	Married	2	1	1	0	0	10	10	1	1	60	0	60	0	0	0	0	0	0	0	0	0	0	0	10	1.04139	7 beneficial	7 useful	7 important	5	5	5	7 approving	7 supportive	7 encouraging	5	6
35	35	35	3	1					University degree or higher	No (or on maternity leave)	No	No	Married	2	1	6	2	120	0	120	0	0	0	0	0	2	1	60	0	60	120	0	0	0	0	0	240	2.38202	7 beneficial	5	5	7 enjoyable	6	6	5	7 supportive	7 encouraging	6	5
36	36	38	3	1					University degree or higher	No (or on maternity leave)	No	No	Married	2	1	2	3	180	0	180	0	0	0	0	0	0	0	0	0	0	0	0	0	0	0	0	180	2.25768	7 beneficial	4	5	5	5	6	7 approving	6	5	3	4
41	41	29	1				Completed year 12			No (or on maternity leave)	No	No	Defacto relationship	1	1	5	4	240	0	240	0	0	0	0	0	3	4	240	0	240	480	0	0	0	0	0	720	2.85794	7 beneficial	7 useful	7 important	7 enjoyable	7 fun	7 pleasurable	7 approving	7 supportive	7 encouraging	7 agree	6
43	43	35	7	5				Diploma/TAFE certificate		Yes part time	No	No	Married	2	1	2	0	0	30	30	0	0	0	0	0	0	0	0	0	0	0	0	0	0	0	0	30	1.49136	7 beneficial	7 useful	7 important	4	4	4	7 approving	7 supportive	7 encouraging	4	4
45	45	33	7	4	2				University degree or higher	No (or on maternity leave)	No	No	Married	3	1	4	2	120	30	150	0	0	0	0	0	2	1	60	30	90	180	4	2	120	0	120	450	2.65418	7 beneficial	7 useful	7 important	7 enjoyable	6	7 pleasurable	7 approving	7 supportive	7 encouraging	6	6
46	46	29	3						University degree or higher	Yes part time	No	No	Married	1	1	8	0	0	150	150	1	0	0	120	120	1	0	0	60	60	120	0	0	0	0	0	270	2.43297	5	7 useful	7 important	7 enjoyable	7 fun	7 pleasurable	7 approving	7 supportive	7 encouraging	6	6
55	55	38	4	2					University degree or higher	Yes part time	No	No	Married	2	1	3	7	420	0	420	0	0	0	0	0	0	0	0	0	0	0	0	0	0	0	0	420	2.62428	7 beneficial	7 useful	7 important	7 enjoyable	6	6	7 approving	7 supportive	7 encouraging	4	5
56	56	39	3						University degree or higher	Yes part time	No	No	Defacto relationship	1	1	12	3	180	0	180	0	0	0	0	0	5	2	120	30	150	300	0	0	0	0	0	480	2.68215	5	5	4	6	6	6	4	5	5	4	4
61	61	34	1				Completed year 12	Diploma/TAFE certificate		No (or on maternity leave)	No	No	Married	1	1	4	3	180	30	210	0	0	0	0	0	0	0	0	0	0	0	0	0	0	0	0	210	2.32428	7 beneficial	6	5	5	5	5	7 approving	7 supportive	7 encouraging	4	4
																																				Mean	294.4	2.11563
																																				SD	306.864	0.789522
[truncated: 83 more columns]
